# Supplementary material
Source: publisher figshare collection journal article supplement (https://karger.figshare.com/articles/dataset/_/9255575)
Supplement: Supplementary file 1 [file 1]

Archive with 2 entries (2 files):
- Materials and Methods.docx
- DRM500636sm_2.pdf
