# Supplementary material
Source: publisher figshare collection journal article supplement (https://karger.figshare.com/articles/dataset/_/9255575)
Supplement: Supplementary file 1 [file 1 › DRM500636sm_2.pdf]

|                                    |                                                                                    | Supplementary material : criteria searched in medical files                                                                     |                                        |
|------------------------------------|------------------------------------------------------------------------------------|---------------------------------------------------------------------------------------------------------------------------------|----------------------------------------|
| About Patients                     | demographics                                                                       | sex                                                                                                                             |                                        |
|                                    |                                                                                    | age                                                                                                                             |                                        |
|                                    |                                                                                    | ECOG                                                                                                                            |                                        |
|                                    |                                                                                    | Home                                                                                                                            | rural/semi-rural/urban<br>nursing home |
|                                    | medical history                                                                    | cancer (except dermatology)                                                                                                     |                                        |
|                                    |                                                                                    | skin cancer                                                                                                                     |                                        |
|                                    |                                                                                    | heart [cardiac failure]                                                                                                         |                                        |
|                                    |                                                                                    | neurologic                                                                                                                      |                                        |
|                                    |                                                                                    | cognitive disorder                                                                                                              |                                        |
|                                    |                                                                                    | psychiatric                                                                                                                     |                                        |
|                                    |                                                                                    | liver failure                                                                                                                   |                                        |
|                                    |                                                                                    | kidney failure                                                                                                                  |                                        |
|                                    |                                                                                    | immunosuppressive therapy                                                                                                       |                                        |
|                                    |                                                                                    | mTOR inhibitor                                                                                                                  |                                        |
| organ transplant recipient         |                                                                                    |                                                                                                                                 |                                        |
| immunosuppressive disease          |                                                                                    |                                                                                                                                 |                                        |
| About initial cSCC                 | histology                                                                          | differentiation grade                                                                                                           | well<br>moderately<br>poorly           |
|                                    |                                                                                    | keratinizing                                                                                                                    |                                        |
|                                    |                                                                                    | embolism                                                                                                                        |                                        |
|                                    |                                                                                    | neurotropism                                                                                                                    |                                        |
|                                    |                                                                                    | not compliant with HAS guidelines                                                                                               |                                        |
|                                    | initial location                                                                   |                                                                                                                                 |                                        |
|                                    | date of first notification of suspicious lesion (as reported on medical report)    |                                                                                                                                 |                                        |
|                                    | date of initial histological diagnosis                                             |                                                                                                                                 |                                        |
|                                    | date of the first notification of advanced disease (as reported on medical report) |                                                                                                                                 |                                        |
|                                    | initial management                                                                 | surgery + histopathologic assessment of margins (results)<br>revision surgery + histopathologic assessment of margins (results) |                                        |
| About management at advanced stage | recurrence                                                                         | local<br>regional                                                                                                               |                                        |
|                                    |                                                                                    | diagnosed at advanced stage                                                                                                     |                                        |
|                                    | initial management defect                                                          | identification defect                                                                                                           |                                        |
|                                    |                                                                                    | characterization defect                                                                                                         |                                        |
|                                    |                                                                                    | Incomplete histological report                                                                                                  |                                        |
|                                    |                                                                                    | treatment defect                                                                                                                |                                        |
|                                    | initial management without anomaly according HAS guidelines                        |                                                                                                                                 |                                        |
|                                    | Initial management without anomaly (excluding incomplete histological report)      |                                                                                                                                 |                                        |
|                                    | treatment at the advanced stage                                                    | palliative care                                                                                                                 | firstly<br>after second review         |
|                                    |                                                                                    | surgery                                                                                                                         |                                        |
|                                    |                                                                                    | surgery + radiotherapy                                                                                                          |                                        |
|                                    |                                                                                    | surgery + chemotherapy                                                                                                          |                                        |
|                                    |                                                                                    | surgery + radiotherapy + chemotherapy                                                                                           |                                        |
|                                    |                                                                                    | chemotherapy                                                                                                                    |                                        |

| Supplementary material : characteristics of patients who received only palliative care n=40 |                                             |                      |
|---------------------------------------------------------------------------------------------|---------------------------------------------|----------------------|
| sex ratio M/F                                                                               |                                             | 22/18                |
| mean age (years old)                                                                        |                                             | 88,5                 |
| mean ECOG (performance statut)                                                              |                                             | 2                    |
| medical history                                                                             | cancer (except skin)                        | 10 (25%)             |
|                                                                                             | skin cancer                                 | 19 (48%)             |
|                                                                                             | heart [cardiac failure]                     | 26 (65%) [13 ] (33%) |
|                                                                                             | neurologic                                  | 10 (25%)             |
|                                                                                             | cognitive disorder                          | 17 (43%)             |
|                                                                                             | psychiatric                                 | 4 (10%)              |
|                                                                                             | renal failure                               | 6 (40%)              |
|                                                                                             | organ transplant recipient                  | 1 (2%)               |
|                                                                                             | immunosuppressed                            | 2 (5%)               |
| areas                                                                                       | rural                                       | 12 (30%)             |
|                                                                                             | semi-rural                                  | 20 (50%)             |
|                                                                                             | urban                                       | 8 (20%)              |
| nursing home                                                                                |                                             | 13 (33%)             |
| cSCC characteristics                                                                        | locations                                   |                      |
|                                                                                             | head and neck                               | 29                   |
|                                                                                             | lower member                                | 7                    |
|                                                                                             | others                                      | 3                    |
|                                                                                             | Histology                                   |                      |
|                                                                                             | well differentiated <sub>(n=32)</sub>       | 25                   |
|                                                                                             | moderately differentiated <sub>(n=32)</sub> | 4                    |
|                                                                                             | poorly differentiated <sub>(n=32)</sub>     | 3                    |
|                                                                                             | embolism <sub>(n=13)</sub>                  | 3                    |
|                                                                                             | neurotropism <sub>(n=14)</sub>              | 4                    |
|                                                                                             | keratinizing <sub>(n=22)</sub>              | 20                   |
| initial cSSC management                                                                     | identification defect                       | 18 (45%)             |
|                                                                                             | characterisation defect                     | 0                    |
|                                                                                             | treatment defect                            | 8                    |
