# Supplementary material
Source: publisher figshare collection journal article supplement (https://karger.figshare.com/articles/dataset/_/9255575)
Supplement: Supplementary file 1 [file 1 › Materials and Methods.docx]

**Materials and Methods**

A retrospective, descriptive, single-centre study was conducted on a routine care cohort of advanced cutaneous squamous cell carcinoma (A-cSCC) patients at our tertiary referral centre. A-cSCC was defined as cSCC with distant metastasis and/or those patients whose initial treatment, as evaluated by a multidisciplinary team, could not be performed with surgical excision under local/regional anaesthesia only. All cSCC cases (*n* = 16,22) registered in the regional dermatology tumour database from 1 January 2012 to 31 December 2015 were reviewed. Over this 3-year period, a total of 109 patients with A-cSCC were identified and analysed. Since our facility is the only referral centre for skin cancers in a region with 3 million inhabitants, this methodology allowed a representative study population to be selected.

The following data were retrieved from the medical records of each patient and from the electronic report form of our regional dermatology tumour database: demographic characteristics, medical history, living conditions, along with characteristics of the A-cSCC lesions (location, histology and histological prognosis criteria, therapeutic history of the tumour when relevant) (see suppl. material for an exhaustive description of variables).

A model of theoretic optimal management of the primary cSCC was constructed using the French national guidelines (Fig. 1). Possible deficiencies were identified for each patient, and then collected and categorized as follows: deficiency in identification of the primary tumour (i.e., the lesion was not referred for management before advanced stage of the disease whether or not the patient had undergone medical follow-up for any reason); deficiency in the characterization/diagnosis of the primary tumour (i.e., cutaneous abnormality was identified by a physician, but no biopsy was taken); deficiency in the pathology report (i.e., one or more validated histological prognostic criteria were not reported on the initial pathology report); deficiency in the initial therapeutic procedure (i.e., no treatment was proposed for an cSCC, or incomplete surgical excision, additional surgery, or additional radiotherapy was not proposed).

Analyses were performed using GraphPad Prism statistical software, release 6.0 (GraphPad, La Jolla, CA, USA). Quantitative variables are presented as mean (95% CI) or median (interquartile range), according to their distribution. Qualitative variables are presented as percentages of the analysed data.
